# Supplementary material for: Genome properties of key oil palm (Elaeis guineensis Jacq.) breeding populations
Source: Research Square preprint supplement (doi:10.21203/rs.3.rs-1307249/v1), 2022-02-03

**Supplementary Figure 1:** Distribution of percentage of missing data (a) per SNP and (b) per individual for Deli and La Mé oil palm breeding populations.

**(a)**


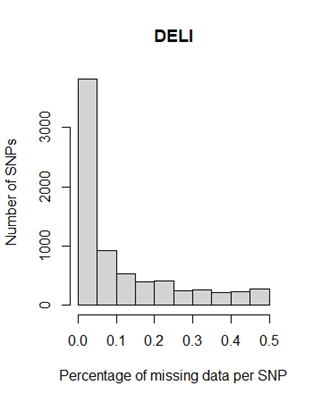

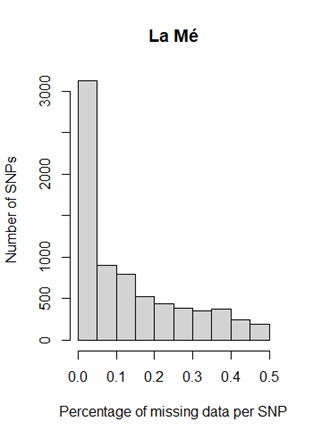


**(b)**

**(a)**


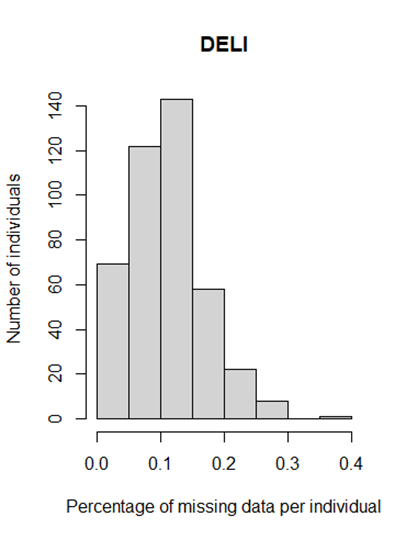

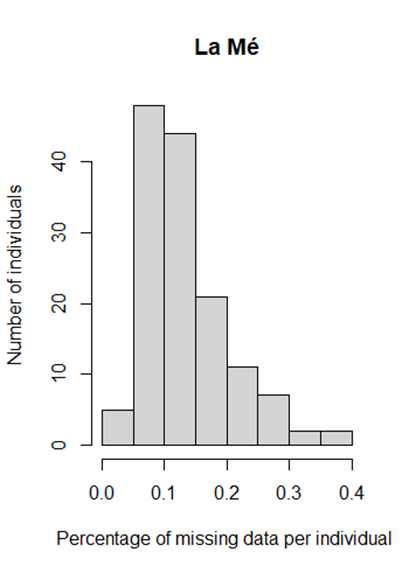

Supplement: Supplementary file 1 [file cf0fcb37861049ab0e38f60f.docx]
